# Supplementary material for: Synthesis of Ag2S quantum dots by a single-source precursor: an efficient electrode material for rapid detection of phenol
Source: Royal Society of Chemistry journal article supplement (doi:10.1039/c3ay42264j), 2014-01-01
Supplement: c3ay42264j.pdf [file c3ay42264j.pdf]

## Electronic Supplementary Information

### Synthesis of Ag<sub>2</sub>S quantum dots by a single-source precursor: an efficient electrode material for rapid detection of phenol

Swarup Kumar Maji,<sup>a,‡</sup> Sivaramapanicker Sreejith,<sup>a,‡</sup> Amal Kumar Mandal,<sup>a,‡</sup> Amit Kumar Dutta,<sup>b</sup> and Yanli Zhao<sup>\*,a,c</sup>

<sup>a</sup> Division of Chemistry and Biological Chemistry, School of Physical and Mathematical Sciences, Nanyang Technological University, 21 Nanyang Link, 637371, Singapore

Fax: (+65) 6791 1961

E-mail: [zhaoyanli@ntu.edu.sg](mailto:zhaoyanli@ntu.edu.sg)

Homepage: [www.ntu.edu.sg/home/zhaoyanli/](http://www.ntu.edu.sg/home/zhaoyanli/)

<sup>b</sup> Department of Chemistry, Bengal Engineering and Science University, Howrah 711103, West Bengal, India

<sup>c</sup> School of Materials Science and Engineering, Nanyang Technological University, 50 Nanyang Avenue, 639798, Singapore

<sup>‡</sup> These authors contributed equally to this work.

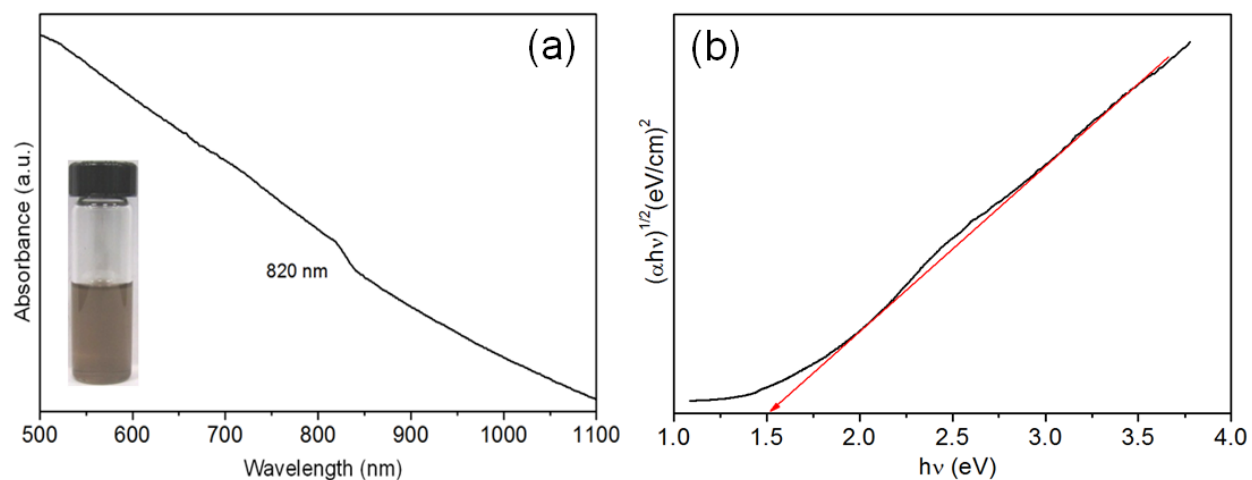

**Figure S1.** (a) UV-vis-NIR absorption spectrum of  $\text{Ag}_2\text{S}$  QDs. Inset: photograph of  $\text{Ag}_2\text{S}$  QDs dissolved in cyclohexane under daylight. (b) Corresponding Tauc's plot for the determination of band gap energy of  $\text{Ag}_2\text{S}$  QDs.

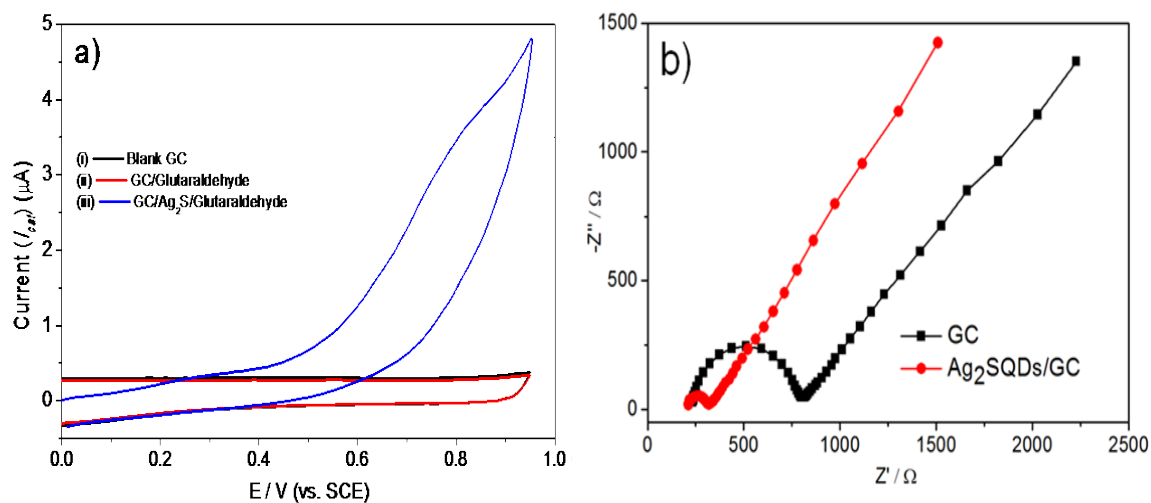

**Figure S2.** a) Cyclic voltammograms of GC, GC coated with glutarealdehyde, and  $\text{Ag}_2\text{S}$  QD/GC coated with glutarealdehyde in 0.1 M PBS (pH 7, 40 °C) at scan rate of 0.1  $\text{Vs}^{-1}$ . b) Nyquist plots of GC and  $\text{Ag}_2\text{S}$  QD/GC electrodes in 0.1 M KCl containing 5 mM  $\text{Fe}(\text{CN})_6^{4-/3-}$  solution (40mL, 1:1) from 0.1 Hz to 10.0 kHz.

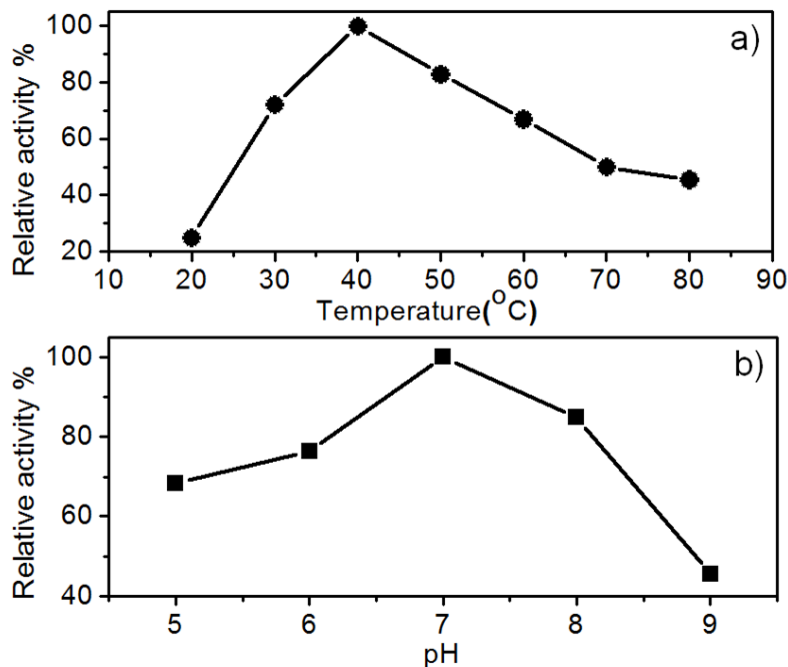

**Figure S3.** Effects of (a) temperature and (b) pH on the electro-catalytic activity of Ag<sub>2</sub>S QD/GC electrode in 0.1 M PBS (vs. Ag/AgCl).

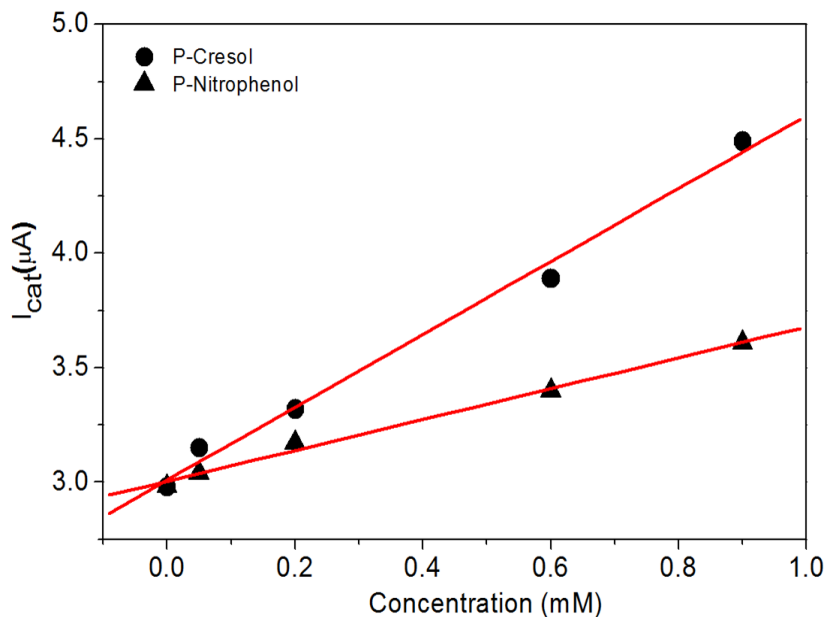

**Figure S4.** Calibration plots (oxidation current vs. concentration) of Ag<sub>2</sub>S QD/GC electrode upon successive addition of *p*-cresol and *p*-nitrophenol to 0.1 M PBS (pH 7, 40 °C).

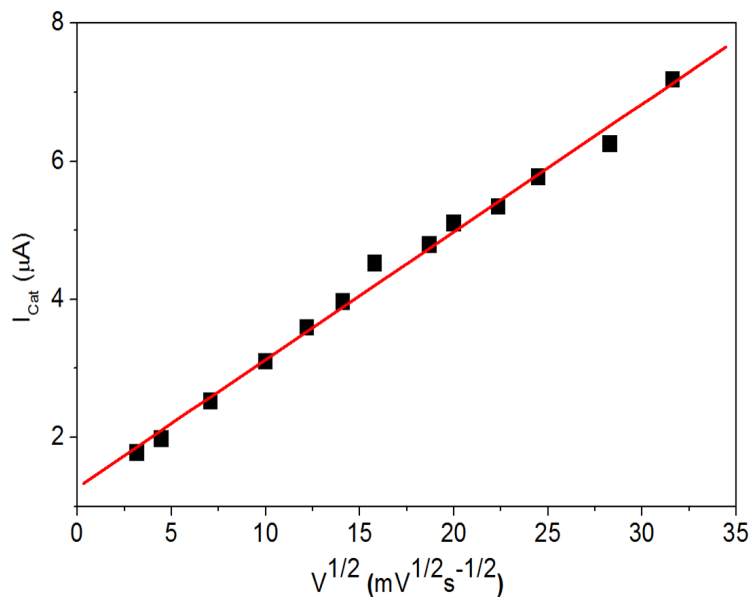

**Figure S5.** Linear relationship between the oxidation peak current (+0.78 V) and the square of scan rates (scan rates: 20, 50, 100, 300, 500, 600  $\text{mVs}^{-1}$ ) for  $\text{Ag}_2\text{S}$  QD/GC electrode in 0.1 M PBS (pH 7, 40 °C) with 0.05 mM phenol.

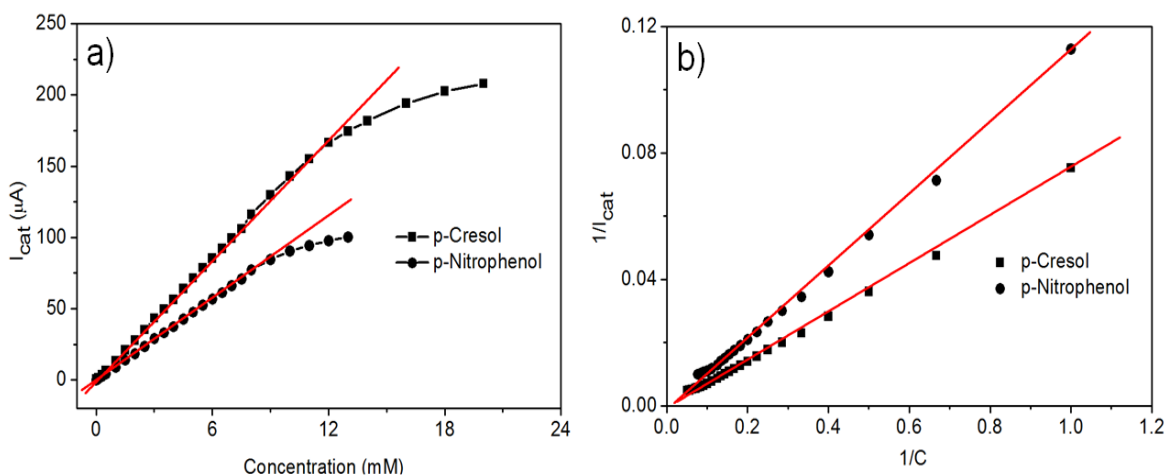

**Figure S6.** (a) Calibration plots derived from amperometric responses and (b) Lineweaver-Burk plot of  $\text{Ag}_2\text{S}$  QD/GC electrode with successive addition of *p*-cresol and *p*-nitrophenol into 0.1 M PBS (pH 7, 40 °C) at +0.78 V (vs. Ag/AgCl).

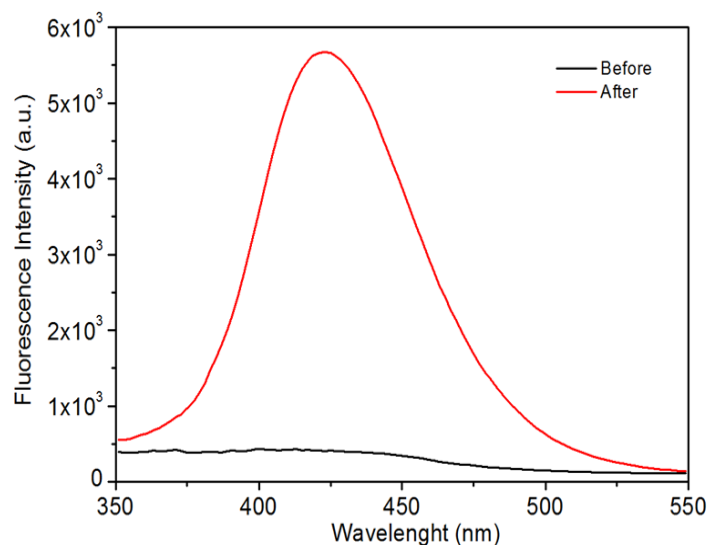

**Figure S7.** Proof for hydroxyl radical generation. Photoluminescence spectral changes of terephthalic acid solution analyzed after electro-decomposition of  $\text{Ag}_2\text{S}$  QD/GC electrode.

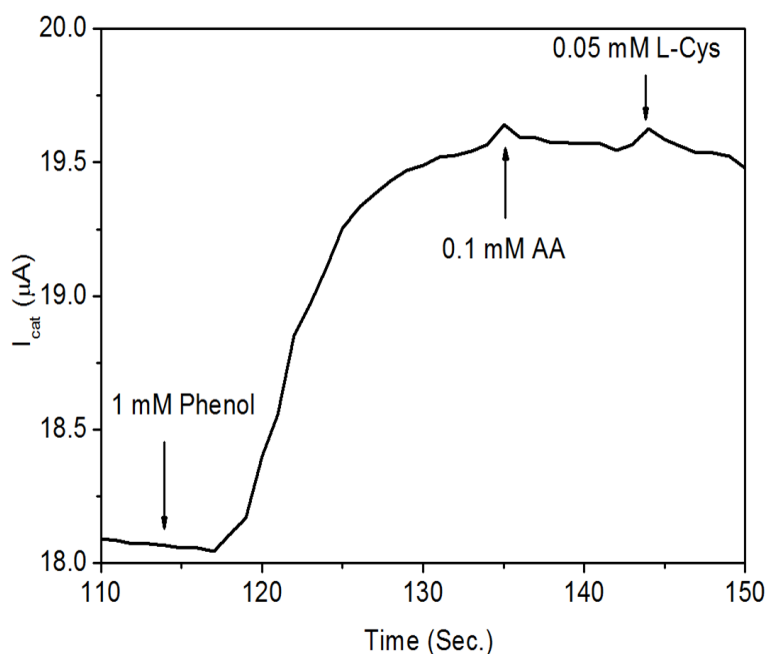

**Figure S8.** Amperometric response of  $\text{Ag}_2\text{S}$  QD/GC electrode with successive addition of 1 mM phenol, 0.1 mM AA and 0.05 mM *L*-Cys into 0.1 M PBS at +0.78 V (vs. Ag/AgCl) (pH 7, 40 °C).
